# Supplementary material
Source: PubMed Central journal article supplement (PMC2718326)
Supplement: NIHMS5180-supplement-1.pdf [file NIHMS5180-supplement-1.pdf]

Supp. Table S1. Mutations in MKS genes in allelic disorders.

| Family ID            | Syndrome | Allele 1  |                             |                          | Allele 2  |                             |                    | Origin    | Reference                |
|----------------------|----------|-----------|-----------------------------|--------------------------|-----------|-----------------------------|--------------------|-----------|--------------------------|
|                      |          | Exon/int. | Mutation 1                  | Effect on protein        | Exon/int. | Mutation 2                  | Effect on protein  |           |                          |
| <b>MKS1</b>          |          |           |                             |                          |           |                             |                    |           |                          |
| PB215-04             | BBS      |           | n.d. in original article    | p.Cys492Trp              |           | n.d. in original article    | p.Phe371del        | Turkey    | [Leitch et al., 2008]    |
| <b>TMEM67 (MKS3)</b> |          |           |                             |                          |           |                             |                    |           |                          |
| JS-661 and 660       | JS       | ex15      | c.1538A>G                   | p.Tyr513Cys              | ex22      | c.2315_2323+4del13insGG     | missplicing        | Europe    | [Baala et al., 2007b]    |
| JS-05                | JS       | int23     | c.2439+5G>C                 | Ile775_Ala813del ^       | int23     | c.2439+5G>C                 | Ile775_Ala813del ^ | Algeria   | [Baala et al., 2007b]    |
| JS-09 <sup>§</sup>   | JS       | int6      | c.651+2T>G                  | pot. missplicing         | ex21      | c.2341G>A #                 | p.Gln747fs #       | Europe    | [Baala et al., 2007b]    |
|                      |          | ex16      | c.1634G>A                   | p.Gly545Glu              |           |                             |                    |           |                          |
| NPH-786              | JS       | ex6       | c.637C>T                    | p.Arg213Cys              | ex21      | c.2132A>C                   | p.Asp711Ala        | Europe    | [Baala et al., 2007b]    |
| COR09                | COACH    | ex17      | c.1769T>C                   | p.Phe590Ser              | int19     | c.1961-2A>C                 | Ala621_Glu700del ^ | Europe    | [Brancati et al., 2008a] |
| COR20                | COACH    | ex6       | c.579_580delAG              | p.Gly195fs               | ex17      | c.1769T>C                   | p.Phe590Ser        | Europe    | [Brancati et al., 2008a] |
| COR32                | COACH    | ex11      | c.1115C>A                   | p.Thr372Lys              | ex23      | c.2345A>G                   | p.His782Arg        | Europe    | [Brancati et al., 2008a] |
| COR71                | COACH    | ex3       | c.389C>G                    | p.Pro130Arg              | ex7       | c.675G>A                    | p.Trp225X          | Europe    | [Brancati et al., 2008a] |
| COR94                | COACH    | ex13      | c.1319G>A                   | p.Arg440Gln              | ex21      | c.2182A>G                   | p.Ser728Gly        | Europe    | [Brancati et al., 2008a] |
| COR190               | COACH    | int2      | c.312+5G>A                  | pot. missplicing         | ex24      | c.2498T>C                   | p.Ile833Thr        | Europe    | [Brancati et al., 2008a] |
| MTI124               | COACH    | ex24      | c.2498T>C                   | p.Ile833Thr              | int 24    | c.2556+1G>T                 | pot. missplicing   | Europe    | [Brancati et al., 2008a] |
| <b>CEP290 (MKS4)</b> |          |           |                             |                          |           |                             |                    |           |                          |
| Family 7             | CORS     | ex26      | c.2906dupA                  | p.Tyr969X                | ex31      | c.3793C>T                   | p.Gln1265X         | Europe    | [Baala et al., 2007a]    |
| Family 8             | CORS     | ex27      | c.3043G>T                   | p.Glu1015X               | int27     | c.3104-1G>A                 | pot. missplicing   | Palestina | [Baala et al., 2007a]    |
| Family 9             | CORS     | ex41      | c.5649dupA                  | p. Leu1884fs             | ex42      | c.5850delT                  | p. Phe1950fs       | Europe    | [Baala et al., 2007a]    |
| Family 10            | CORS     | ex20      | c.1984C>T                   | p.Gln662X                | ex20      | c.1984C>T                   | p.Gln662X          | Europe    | [Baala et al., 2007a]    |
| F4 (II-1) and (II-2) | SLS      | ex23      | c.2218_2222delccagATAGA     | pot. missplicing         | ex23      | c.2218_2222delccagATAGA     | pot. missplicing   | Turkey    | [Sayer et al., 2006]     |
| F63 (II-1)           | JS       | ex36      | c.4656delA                  | p.Glu1553fs<br>Lys1552fs | ex41      | c.5668G>T                   | p.Gly1890X         | Europe    | [Sayer et al., 2006]     |
| A197(II-1)           | JS       | ex29      | c.3175dupA<br>3175_3176insA | p.Ile1059fs              | ex55      | c.7341dupA 7341_7342insA    | p.Leu2448fs        | Europe    | [Sayer et al., 2006]     |
| F89 (II-1)           | JS       | ex41      | c.5515_5518delGAGA          | p.Glu1839fs              | ex42      | c.5649_5650insA<br>5649insA | p. Leu1884fs       | Europe    | [Sayer et al., 2006]     |

| Allele 1          |             |           |                             |                      | Allele 2  |                      |                          |                              |                                                                                                |
|-------------------|-------------|-----------|-----------------------------|----------------------|-----------|----------------------|--------------------------|------------------------------|------------------------------------------------------------------------------------------------|
| Family ID         | Syndrome    | Exon/int. | Mutation 1                  | Effect on protein    | Exon/int. | Mutation 2           | Effect on protein        | Origin                       | Reference                                                                                      |
| In 6 families     | JS/JSRD-SLS | ex41      | c.5668G>T                   | p.Gly1890X           | ex41      | c.5668G>T            | p.Gly1890X               | United Arab Emirates, Turkey | [Brancati et al., 2007; Sayer et al., 2006; Valente et al., 2006]                              |
| F9                | JS          | ex41      | c.5649dupA<br>5649_5650insA | p. Leu1884fs         | ex42      | c.5850delT           | p. Phe1950fs             | Europe                       | [Tory et al., 2007]                                                                            |
| F72               | JS          | ex37      | c.4963_4964delAG            | p.Arg1665fs          | int2      | c.103-13_18delGCTTTT | pot. missplicing         | Europe                       | [Tory et al., 2007]                                                                            |
| F99               | JS          | ex22      | c.2251C>T                   | p.Arg751X            | ex50      | c.6869delA           | p. Asn2290fs             | Europe                       | [Tory et al., 2007]                                                                            |
| F265 <sup>a</sup> | JS          | ex5       | c.287delA                   | p.Asn96fs            | ex5       | c.287delA            | p.Asn96fs                | Europe                       | [Tory et al., 2007]                                                                            |
| F375              | JS          | ex15      | c.1361delG                  | p.Gly454fs           | ex50      | c.6869delA           | p. Asn2290fs             | Europe                       | [Tory et al., 2007]                                                                            |
| F358              | JS          | ex17      | c.1645C>T                   | p.Arg549X            | ex41      | c.5649_5650insA      | p. Leu1884fs             | Europe                       | [Tory et al., 2007]                                                                            |
| F419              | JS          | int28     | c.3310-1G>C                 | pot. missplicing     | int45     | c.6271-8T>G          | pot. missplicing         | Argentina                    | [Tory et al., 2007]                                                                            |
| F858-2            | JS          | int32     | c.4195-1G>A                 | pot. missplicing     | ex41      | c.5649_5650insA      | p. Leu1884fs             | Europe                       | [Tory et al., 2007]                                                                            |
| COR27             | JS          | ex36      | c.4732G>T                   | p.Glu1578X           | ex36      | c.4732G>T            | p.Glu1578X               | Europe                       | [Valente et al., 2006]                                                                         |
| MTI133            | JS          | ex42      | c.5824C>T                   | p.Gln1924X           | ex42      | c.5824C>T            | p.Gln1924X               | Palestina                    | [Valente et al., 2006]                                                                         |
| COR22             | JS          | ex2       | c.21G>T                     | p.Trp7Cys            | ex2       | c.21G>T              | p.Trp7Cys                | Pakistan                     | [Valente et al., 2006]                                                                         |
| MK05              | JS          | ex28      | c.3176delT                  | p. Ile1059fs         | ex28      | c.3176delT           | p. Ile1059fs             | Turkey                       | [Valente et al., 2006]                                                                         |
| In 3 families     | JS          | ex31      | c.3811C>T                   | p.Arg1271X           | ex43      | c.5734delT           | p.Trp1912fs<br>Trp1911fs | Europe                       | [Brancati et al., 2007; den Hollander et al., 2006; Helou et al., 2007; Perrault et al., 2007] |
| A989              | JS          | ex38      | c.4882C>T                   | p.Gln1682X           | ex44      | c.5941G>T            | p.Glu1981X               | Europe                       | [Helou et al., 2007]                                                                           |
| F101              | JS          | int12     | c.1066-1G>A                 | pot. missplicing     | ex39      | c.5163delT           | p.Thr1721fs              | America                      | [Helou et al., 2007]                                                                           |
| F57               | SLS         | ex2       | c.1A>G                      | p.Met1?<br>p.Met1Val | ex15      | c.1419_1423delAATAA  | p.Ile474fs<br>Lys473fs   | Europe                       | [Helou et al., 2007]                                                                           |
| in 11 families    | LCA         | int26     | c.2991+1655A>G              | p.Cys998X ^          | int26     | c.2991+1655A         | p.C998X ^                | Europe                       | [Cideciyan et al., 2007; den Hollander et al., 2006; Perrault et al., 2007]                    |
| 13168             | LCA         | int26     | c.2991+1655A>G              | p.Cys998X ^          | ex22      | c.2249T>G            | p.Leu750X                | Europe                       | [den Hollander et al., 2006]                                                                   |
| 14964             | LCA         | int26     | c.2991+1655A>G              | p.Cys998X ^          | ex55      | c.7341dupA           | p.Leu2448fs              | Europe                       | [den Hollander et al., 2006]                                                                   |
| 15103             | LCA         | int26     | c.2991+1655A>G              | p.Cys998X ^          | ex21      | c.2118_2122dupTCAGC  | p.Thr709fs               | Europe                       | [den Hollander et al., 2006]                                                                   |
| 15212             | LCA         | int26     | c.2991+1655A>G              | p.Cys998X ^          | ex43      | c.5866G>T            | p.Glu1956X               | Europe                       | [den Hollander et al., 2006]                                                                   |
| 17971             | LCA         | int26     | c.2991+1655A>G              | p.Cys998X ^          | ex31      | c.3814C>T            | p.Arg1272X               | Europe                       | [den Hollander et al., 2006]                                                                   |
| 20152             | LCA         | int26     | c.2991+1655A>G              | p.Cys998X ^          | ex10      | c.679_680delGA       | p.Glu227fs               | Europe                       | [den Hollander et al., 2006]                                                                   |

| Family ID     | Syndrome | Allele 1  |                |                   |           | Allele 2               |                          |        |                              | Reference |
|---------------|----------|-----------|----------------|-------------------|-----------|------------------------|--------------------------|--------|------------------------------|-----------|
|               |          | Exon/int. | Mutation 1     | Effect on protein | Exon/int. | Mutation 2             | Effect on protein        | Origin |                              |           |
| 21393         | LCA      | int26     | c.2991+1655A>G | p.Cys998X ^       | ex5       | c.265dupA              | p.Thr89fs                | Europe | [den Hollander et al., 2006] |           |
| 21918         | LCA      | int26     | c.2991+1655A>G | p.Cys998X ^       | int3      | c.180+1G>T             | pot. missplicing         | Europe | [den Hollander et al., 2006] |           |
| 27242         | LCA      | int26     | c.2991+1655A>G | p.Cys998X ^       | ex16      | c.1550delT             | p.Leu517X                | Canada | [den Hollander et al., 2006] |           |
| 27245         | LCA      | int26     | c.2991+1655A>G | p.Cys998X ^       | ex32      | c.4115_4116delTA       | p. Ile1372fs             | Canada | [den Hollander et al., 2006] |           |
| 27246         | LCA      | int26     | c.2991+1655A>G | p.Cys998X ^       | ex37      | c.4966G>T              | p.Glu1656X               | Canada | [den Hollander et al., 2006] |           |
| 27250         | LCA      | int26     | c.2991+1655A>G | p.Cys998X ^       | ex42      | c.5813_5817delCTTTA    | p.Thr1938fs              | Europe | [den Hollander et al., 2006] |           |
| P3            | LCA      | int26     | c.2991+1655A>G | p.Cys998X ^       | ex37      | c.4882C>T              | p.Gln1628X               | n.d.   | [Cideciyan et al., 2007]     |           |
| P4 and P5     | LCA      | int26     | c.2991+1655A>G | p.Cys998X ^       | ex42      | c.5668G>T              | p.Gly1890X               | n.d.   | [Cideciyan et al., 2007]     |           |
| P7            | LCA      | int26     | c.2991+1655A>G | p.Cys998X ^       | ex14      | c.1260_1264delTAAAG    | p.Lys421fs<br>Thr420fs   | n.d.   | [Cideciyan et al., 2007]     |           |
| in 2 families | LCA      | int26     | c.2991+1655A>G | p.Cys998X ^       | int40     | c.5587-1G>C            | pot. missplicing         | Europe | [Perrault et al., 2007]      |           |
| 654           | LCA      | int26     | c.2991+1655A>G | p.Cys998X ^       | ex19      | c.1855_1858delAAAAG    | p.Arg621fs               | Europe | [Perrault et al., 2007]      |           |
| 726           | LCA      | int26     | c.2991+1655A>G | p.Cys998X ^       | ex28      | c.3175dupA<br>3175insA | p.Ile1059fs              | Europe | [Perrault et al., 2007]      |           |
| 798           | LCA      | int26     | c.2991+1655A>G | p.Cys998X ^       | int38     | c.5226+1G>A            | pot. missplicing         | Europe | [Perrault et al., 2007]      |           |
| in 3 families | LCA      | int26     | c.2991+1655A>G | p.Cys998X ^       | ex38      | c.5163delT             | p.Thr1722fs<br>Thr1721fs | Europe | [Perrault et al., 2007]      |           |
| 659           | LCA      | int26     | c.2991+1655A>G | p.Cys998X ^       | ex20      | c.1992delT             | p.Pro665fs               | Europe | [Perrault et al., 2007]      |           |
| 552           | LCA      | int26     | c.2991+1655A>G | p.Cys998X ^       | ex14      | c.1219_1220delAT       | p.Met407fs               | Europe | [Perrault et al., 2007]      |           |
| 105           | LCA      | int26     | c.2991+1655A>G | p.Cys998X ^       | ex32      | c.5255_5256delGG       | p.Ala1753fs<br>Arg1752fs | Europe | [Perrault et al., 2007]      |           |
| 166           | LCA      | int26     | c.2991+1655A>G | p.Cys998X ^       | ex48      | c.6604delA             | p. Ile2202fs             | Europe | [Perrault et al., 2007]      |           |
| 247           | LCA      | int26     | c.2991+1655A>G | p.Cys998X ^       | ex37      | c.4882C>T              | p.Gln1628X               | Europe | [Perrault et al., 2007]      |           |
| 264           | LCA      | int26     | c.2991+1655A>G | p.Cys998X ^       | ex31      | c.3922C>T              | p.Gln1308X               | Europe | [Perrault et al., 2007]      |           |
| 334           | LCA      | int26     | c.2991+1655A>G | p.Cys998X ^       | ex42      | c.5850delT             | p.Phe1950fs              | Europe | [Perrault et al., 2007]      |           |
| 355           | LCA      | int26     | c.2991+1655A>G | p.Cys998X ^       | int19     | c.1910-2A>G            | pot. missplicing         | Europe | [Perrault et al., 2007]      |           |
| 382           | LCA      | int26     | c.2991+1655A>G | p.Cys998X ^       | ex28      | c.3292G>T              | p.Glu1098X               | Europe | [Perrault et al., 2007]      |           |
| 389           | LCA      | int26     | c.2991+1655A>G | p.Cys998X ^       | ex37      | c.4962_4963delAA       | p.Gln1654fs              | Europe | [Perrault et al., 2007]      |           |
| 445           | LCA      | int26     | c.2991+1655A>G | p.Cys998X ^       | ex31      | c.4028delA             | p.Lys1343fs              | Europe | [Perrault et al., 2007]      |           |
| 513           | LCA      | int26     | c.2991+1655A>G | p.Cys998X ^       | ex6       | c.384_387delTAGA       | p.Asp128fs               | Europe | [Perrault et al., 2007]      |           |
| 416           | LCA      | ex16      | c.1593C>A      | p.Tyr531X         | ex1       | c.2T>A                 | p.Met1Lys                | Europe | [Perrault et al., 2007]      |           |
| in 6 families | LCA      | ex36      | c.4723A>T      | p.Lys1575X        | ex36      | c.4723A>T              | p.Lys1575X               | Europe | [Perrault et al., 2007]      |           |
| 809           | LCA      | ex36      | c.4723A>T      | p.Lys1575X        | ex17      | c.1709C>G              | p.Ser570X                | Europe | [Perrault et al., 2007]      |           |
| 797           | LCA      | ex42      | c.5850delT     | p.Phe1950fs       | int40     | c.5587-1G>C            | pot. missplicing         | Europe | [Perrault et al., 2007]      |           |

| Allele 1                     |          |           |                                        |                          | Allele 2  |                                        |                          |                         |                                                  |
|------------------------------|----------|-----------|----------------------------------------|--------------------------|-----------|----------------------------------------|--------------------------|-------------------------|--------------------------------------------------|
| Family ID                    | Syndrome | Exon/int. | Mutation 1                             | Effect on protein        | Exon/int. | Mutation 2                             | Effect on protein        | Origin                  | Reference                                        |
| 800                          | LCA      | ex42      | c.5850delT                             | p.Phe1950fs              | ex35      | c.4661_4663delAAG                      | p.Glu1554del             | Europe                  | [Perrault et al., 2007]                          |
| 543                          | LCA      | int17     | c.1711+5G>A                            | pot. missplicing         | int40     | c.5587-1G>C                            | pot. missplicing         | Europe                  | [Perrault et al., 2007]                          |
| A3                           | LCA      | ex20      | c.1936C>T                              | p.Gln646X                | ex48      | c.6604delA                             | p.Ile2202fs<br>Ile2203fs | Europe                  | [Perrault et al., 2007]                          |
| COR083                       | JSRD-SLS | ex39      | c.5163delT                             | p.Thr1721fs              | ex39      | c.5163delT                             | p.Thr1722fs<br>Thr1721fs | Europe                  | [Brancati et al., 2007]                          |
| COR145                       | JSRD-SLS | ex17      | 1657_1666delA □                        | p.Leu552fs               | ex44      | c.6031C>T                              | p.Arg2011X               | Europe                  | [Brancati et al., 2007]                          |
| MTI333aa<br>and b            | JSRD-SLS | ex37      | c.4882C>T                              | p.Gln1628X               | ex41      | c.5610_5614delCAAA<br>c.5610delCAAA    | p.Gln1871fs<br>Lys1870fs | America                 | [Brancati et al., 2007]                          |
| COR109                       | JSRD-SLS | ex17      | c.1683delA<br>1682_1683delA            | p.Glu562fs<br>Ala560fs   | ex31      | c.3814C>T                              | p.Arg1272X               | Europe                  | [Brancati et al., 2007]                          |
| COR084                       | JSRD-SLS | ex37      | c.4882C>T                              | p.Gln1628X               | ex43      | c.5941G>T                              | p.Glu1981X               | Russia                  | [Brancati et al., 2007]                          |
| MTI154                       | JSRD-SLS | ex41      | c.5668G>T                              | p.Gly1890X               | ex41      | c.5668G>T                              | p.Gly1890X               | India                   | [Brancati et al., 2007]                          |
| MTI328                       | JSRD-SLS | ex20      | c.1985A>T                              | p.Gln662X                | ex46      | c.6277delG                             | p.Val2093fs<br>Val2092fs | America                 | [Brancati et al., 2007]                          |
| MTI273                       | JSRD-SLS | ex36      | c.4791_4794delTAAA<br>4786_4790delTAAA | p.Lys1598fs<br>Ser1595fs | ex36      | c.4791_4794delTAAA<br>4786_4790delTAAA | Lys1598fs<br>Ser1595fs   | Turkey                  | [Brancati et al., 2007]                          |
| COR125                       | JSRD-SLS | ex40      | c.5434_5435delGA<br>5431_5433delGA     | p.Glu1812fs<br>Asn1810fs | ex41      | c.5668G>T                              | p.Gly1890X               | Europe                  | [Brancati et al., 2007]                          |
| MTI487                       | JSRD-SLS | ex42      | c.5722G>T                              | p.Glu1908X               | ex42      | c.5722G>T                              | p.Glu1908X               | Turkey                  | [Brancati et al., 2007]                          |
| MTI118                       | JSRD-SLS | ex28      | c.3175dupA<br>3167_3175insA            | p.Ile1059fs<br>Ile1055fs | ex41      | c.5668G>T                              | p.Gly1890X               | Europe                  | [Brancati et al., 2007]                          |
| MTI111a<br>and b             | JSRD-SLS | ex44      | c.6072C>A                              | p.Tyr2024X               | ex54      | c.7317_7320dupCTCT<br>7321dupCTCT      | p.Leu2441fs<br>Leu2440fs | Laos                    | [Brancati et al., 2007]                          |
| COR031                       | JSRD-SLS | ex34      | c.4393C>T                              | p.Arg1465X               | ex36      | c.4723A>T                              | p.Lys1575X               | Europe                  | [Brancati et al., 2007]                          |
| MTI012<br>MTI587             | JSRD     | ex41      | c.5668G>T                              | p.Gly1890X               | ex41      | c.5668G>T                              | p.Gly1890X               | United Arab<br>Emirates | [Brancati et al., 2007;<br>Valente et al., 2006] |
| <b><i>RPGRIPL (MKSS)</i></b> |          |           |                                        |                          |           |                                        |                          |                         |                                                  |
| F222-1                       | CORS     | ex6       | c.697A>T                               | p.Lys233X                | ex15      | c.1843A>C                              | p.Thr615Pro              | Europe                  | [Delous et al., 2007]                            |
| F58-1                        | CORS     | ex6       | c.757C>T                               | p.Gln253X                | ex15      | c.1843A>C                              | p.Thr615Pro              | Europe                  | [Delous et al., 2007]                            |
| F42-1, F42-2                 | CORS     | ex15      | c.2083G>C                              | p.Ala695Pro              | ex15      | c.2083G>C                              | p.Ala695Pro              | Europe                  | [Delous et al., 2007]                            |
| UW42                         | JS       | int16     | c.2305-1G>A                            | pot. missplicing         | int16     | c.2305-1G>A                            | pot. missplicing         | Turkey                  | [Arts et al., 2007]                              |

| Family ID                   | Syndrome        | Allele 1  |               |                         | Allele 2  |               |                         | Origin        | Reference                                   |
|-----------------------------|-----------------|-----------|---------------|-------------------------|-----------|---------------|-------------------------|---------------|---------------------------------------------|
|                             |                 | Exon/int. | Mutation 1    | Effect on protein       | Exon/int. | Mutation 2    | Effect on protein       |               |                                             |
| UW43                        | JS              | ex15      | c.1721delA    | p. Tyr574fs             | ex15      | c.1721delA    | p. Tyr574fs             | Turkey        | [Arts et al., 2007]                         |
| UW15                        | JS              | ex15      | c.2050C>T     | p.Gln684X               | ex15      | c.1843A>C     | p. Thr615Pro            | Europe        | [Arts et al., 2007]                         |
| in 4 families               | JS              | ex15      | c.1843A>C     | p. Thr615Pro            | ex 15     | c.1843A>C     | p. Thr615Pro            | Europe        | [Brancati et al., 2008b; Wolf et al., 2005] |
| Family B                    | JS              | ex16      | c.2269delA    | p. Thr757fs             | ex 16     | c.2269delA    | p. Thr757fs             | Morocco       | [Brancati et al., 2008b]                    |
|                             |                 |           | 2268_2269delA | Ile756fs                |           | 2268_2269delA | Ile756fs                |               |                                             |
| A762 II-3                   | CORS            | ex15      | c.1897T>C     | p.Cys633Arg             | ex15      | c.1897T>C     | p.Cys633Arg             | Europe        | [Wolf et al., 2005]                         |
| <b><i>CC2D2A (MKS6)</i></b> |                 |           |               |                         |           |               |                         |               |                                             |
| Mianwali fam                | JS <sup>x</sup> | int18     | c.2182-1G>C   | p.Val728fs <sup>^</sup> | int18     | c.2182-1G>C   | p.Val728fs <sup>^</sup> | Pakistan      | [Noor et al., 2008]                         |
| UW36-IV:4,<br>UW48-IV:7     | JS              | ex27      | c.3364C>T     | p.Pro1122Ser            | ex27      | c.3364C>T     | p.Pro1122Ser            | Saudi Arabian | [Gorden et al., 2008]                       |
| UW47-II:1                   | JS              | ex25      | c.3055C>T     | p.Arg1019X              | ex25      | c.3288G>C     | p.Gln1096His            | n.d.          | [Gorden et al., 2008]                       |
| UW41-IV:1                   | JS              | ex23      | c.2848C>T     | p.Arg950X               | ex23      | c.2848C>T     | p.Arg950X               | n.d.          | [Gorden et al., 2008]                       |
| F871-II:1                   | JS              | ex36      | c.4652T>C     | p.Leu1551Pro            | ex36      | c.4652T>C     | p.Leu1551Pro            | n.d.          | [Gorden et al., 2008]                       |
| UW50-VI                     | JS              | ex36      | c.4582C>T     | p.Arg1528Cys            | ex36      | c.4582C>T     | p.Arg1528Cys            | Levanten Arab | [Gorden et al., 2008]                       |
| UW49-II:1                   | JS              | ex27      | c.3289delG    | p.Val1097fs             | ex36      | c.4582C>T     | p.Arg1528Cys            | n.d.          | [Gorden et al., 2008]                       |

Nucleotide numbering reflects cDNA numbering with +1 corresponding to the A of the ATG translation initiation codon in the reference sequence. The initiation codon is 1.

<sup>#</sup> Mutation marking not recognized by the Mutalyzer program.

<sup>x</sup> Original publication by Noor et al. (2008) reported patients with autosomal recessive mental retardation (ARMR), but Gorden et al. considered the phenotype to resemble more likely JS.

<sup>§</sup> The authors could not determine which of the three detected variants were the disease causing mutations.

<sup>a</sup> A homozygous deletion in the *NPHP1* gene is also observed in the family.

□ Unclear mutation.

n.d. not determined.

## SUPP. TABLE S1 REFERENCES

- Arts HH, Doherty D, van Beersum SE, Parisi MA, Letteboer SJ, Gorden NT, Peters TA, Marker T, Voeselek K, Kartono A, Ozyurek H, Farin FM, Kroes HY, Wolfrum U, Brunner HG, Cremers FP, Glass IA, Knoers NV, Roepman R. 2007. Mutations in the gene encoding the basal body protein RPGRIP1L, a nephrocystin-4 interactor, cause Joubert syndrome. *Nat Genet* 39(7):882-8.
- Baala L, Audollent S, Martinovic J, Ozilou C, Babron MC, Sivanandamoorthy S, Saunier S, Salomon R, Gonzales M, Rattenberry E, Esculpavit C, Toutain A, Moraine C, Parent P, Marcocelles P, Dauge MC, Roume J, Le Merrer M, Meiner V, Meir K, Menez F, Beaufriere AM, Francannet C, Tantau J, Sinico M, Dumez Y, MacDonald F, Munnich A, Lyonnet S, Gubler MC, Genin E, Johnson CA, Vekemans M, Encha-Razavi F, Attie-Bitach T. 2007a. Pleiotropic effects of CEP290 (NPHP6) mutations extend to Meckel syndrome. *Am J Hum Genet* 81(1):170-9.
- Baala L, Romano S, Khaddour R, Saunier S, Smith UM, Audollent S, Ozilou C, Faivre L, Laurent N, Foliguet B, Munnich A, Lyonnet S, Salomon R, Encha-Razavi F, Gubler MC, Boddaert N, de Lonlay P, Johnson CA, Vekemans M, Antignac C, Attie-Bitach T. 2007b. The Meckel-Gruber syndrome gene, MKS3, is mutated in Joubert syndrome. *Am J Hum Genet* 80(1):186-94.
- Brancati F, Barrano G, Silhavy JL, Marsh SE, Travaglini L, Bielas SL, Amorini M, Zablocka D, Kayserili H, Al-Gazali L, Bertini E, Boltshauser E, D'Hooghe M, Fazzi E, Fenerci EY, Hennekam RC, Kiss A, Lees MM, Marco E, Phadke SR, Rigoli L, Romano S, Salpietro CD, Sherr EH, Signorini S, Stromme P, Stuart B, Sztrihai L, Viskochil DH, Yuksel A, Dallapiccola B, Valente EM, Gleeson JG. 2007. CEP290 mutations are frequently identified in the oculo-renal form of Joubert syndrome-related disorders. *Am J Hum Genet* 81(1):104-13.
- Brancati F, Iannicelli M, Travaglini L, Mazzotta A, Bertini E, Boltshauser E, D'Arrigo S, Emma F, Fazzi E, Gallizzi R, Gentile M, Loncarevic D, Mejaski-Bosnjak V, Pantaleoni C, Rigoli L, Salpietro CD, Signorini S, Stringini GR, Verloes A, Zablocka D, Dallapiccola B, Gleeson JG, Valente EM. 2008a. MKS3/TMEM67 mutations are a major cause of COACH Syndrome, a Joubert syndrome related disorder with liver involvement. *Hum Mutat*.
- Brancati F, Travaglini L, Zablocka D, Boltshauser E, Accorsi P, Montagna G, Silhavy JL, Barrano G, Bertini E, Emma F, Rigoli L, Dallapiccola B, Gleeson JG, Valente EM. 2008b. RPGRIP1L mutations are mainly associated with the cerebello-renal phenotype of Joubert syndrome-related disorders. *Clin Genet* 74(2):164-70.
- Cideciyan AV, Aleman TS, Jacobson SG, Khanna H, Sumaroka A, Aguirre GK, Schwartz SB, Windsor EA, He S, Chang B, Stone EM, Swaroop A. 2007. Centrosomal-ciliary gene CEP290/NPHP6 mutations result in blindness with unexpected sparing of photoreceptors and visual brain: implications for therapy of Leber congenital amaurosis. *Hum Mutat* 28(11):1074-83.
- Delous M, Baala L, Salomon R, Laclef C, Vierkotten J, Tory K, Golzio C, Lacoste T, Besse L, Ozilou C, Moutkine I, Hellman NE, Anselme I, Silbermann F, Vesque C, Gerhardt C, Rattenberry E, Wolf MT, Gubler MC, Martinovic J, Encha-Razavi F, Boddaert N, Gonzales M, Macher MA, Nivet H, Champion G, Bertheleme JP, Niaudet P, McDonald F, Hildebrandt F, Johnson CA, Vekemans M, Antignac C, Ruther U, Schneider-Maunoury S, Attie-Bitach T, Saunier S. 2007. The ciliary gene RPGRIP1L is mutated in cerebello-oculo-renal syndrome (Joubert syndrome type B) and Meckel syndrome. *Nat Genet* 39(7):875-81.
- den Hollander AI, Koenekoop RK, Yzer S, Lopez I, Arends ML, Voeselek KE, Zonneveld MN, Strom TM, Meitinger T, Brunner HG, Hoyng CB, van den Born LI, Rohrschneider K, Cremers FP. 2006. Mutations in the CEP290 (NPHP6) gene are a frequent cause of Leber congenital amaurosis. *Am J Hum Genet* 79(3):556-61.
- Gorden NT, Arts HH, Parisi MA, Coene KL, Letteboer SJ, van Beersum SE, Mans DA, Hikida A, Eckert M, Knutzen D, Alswaid AF, Ozyurek H, Dibooglu S, Otto EA, Liu Y, Davis EE, Hutter CM, Bammler TK, Farin FM, Dorschner M, Topcu M, Zackai EH, Rosenthal P, Owens KN, Katsanis N, Vincent JB, Hildebrandt F, Rubel EW, Raible DW, Knoers NV, Chance PF, Roepman R, Moens CB, Glass IA, Doherty D. 2008. CC2D2A Is Mutated in Joubert Syndrome and Interacts with the Ciliopathy-Associated Basal Body Protein CEP290. *Am J Hum Genet*.
- Helou J, Otto EA, Attanasio M, Allen SJ, Parisi MA, Glass I, Utsch B, Hashmi S, Fazzi E, Omran H, O'Toole JF, Sayer JA, Hildebrandt F. 2007. Mutation analysis of NPHP6/CEP290 in patients with Joubert syndrome and Senior-Loken syndrome. *J Med Genet* 44(10):657-63.

- Leitch CC, Zaghoul NA, Davis EE, Stoetzel C, Diaz-Font A, Rix S, Alfadhel M, Lewis RA, Eyaid W, Banin E, Dollfus H, Beales PL, Badano JL, Katsanis N. 2008. Hypomorphic mutations in syndromic encephalocele genes are associated with Bardet-Biedl syndrome. *Nat Genet* 40(4):443-8.
- Noor A, Windpassinger C, Patel M, Stachowiak B, Mikhailov A, Azam M, Irfan M, Siddiqui ZK, Naeem F, Paterson AD, Lutfullah M, Vincent JB, Ayub M. 2008. CC2D2A, encoding a coiled-coil and C2 domain protein, causes autosomal-recessive mental retardation with retinitis pigmentosa. *Am J Hum Genet* 82(4):1011-8.
- Perrault I, Delphin N, Hanein S, Gerber S, Dufier JL, Roche O, Defoort-Dhellemmes S, Dollfus H, Fazzi E, Munnich A, Kaplan J, Rozet JM. 2007. Spectrum of NPHP6/CEP290 mutations in Leber congenital amaurosis and delineation of the associated phenotype. *Hum Mutat* 28(4):416.
- Sayer JA, Otto EA, O'Toole JF, Nurnberg G, Kennedy MA, Becker C, Hennies HC, Helou J, Attanasio M, Fausett BV, Utsch B, Khanna H, Liu Y, Drummond I, Kawakami I, Kusakabe T, Tsuda M, Ma L, Lee H, Larson RG, Allen SJ, Wilkinson CJ, Nigg EA, Shou C, Lillo C, Williams DS, Hoppe B, Kemper MJ, Neuhaus T, Parisi MA, Glass IA, Petry M, Kispert A, Gloy J, Ganner A, Walz G, Zhu X, Goldman D, Nurnberg P, Swaroop A, Leroux MR, Hildebrandt F. 2006. The centrosomal protein nephrocystin-6 is mutated in Joubert syndrome and activates transcription factor ATF4. *Nat Genet* 38(6):674-81.
- Tory K, Lacoste T, Burglen L, Moriniere V, Boddaert N, Macher MA, Llanas B, Nivet H, Bensman A, Niaudet P, Antignac C, Salomon R, Saunier S. 2007. High NPHP1 and NPHP6 mutation rate in patients with Joubert syndrome and nephronophthisis: potential epistatic effect of NPHP6 and AHI1 mutations in patients with NPHP1 mutations. *J Am Soc Nephrol* 18(5):1566-75.
- Valente EM, Silhavy JL, Brancati F, Barrano G, Krishnaswami SR, Castori M, Lancaster MA, Boltshauser E, Boccone L, Al-Gazali L, Fazzi E, Signorini S, Louie CM, Bellacchio E, Bertini E, Dallapiccola B, Gleeson JG. 2006. Mutations in CEP290, which encodes a centrosomal protein, cause pleiotropic forms of Joubert syndrome. *Nat Genet* 38(6):623-5.
- Wolf MT, Lee J, Panther F, Otto EA, Guan KL, Hildebrandt F. 2005. Expression and phenotype analysis of the nephrocystin-1 and nephrocystin-4 homologs in *Caenorhabditis elegans*. *J Am Soc Nephrol* 16(3):676-87.

Supp. Table S2. PolyPhen ja SIFT predictions of the new variants.

| Gene        | Amino acid substitution | PolyPhen          | SIFT          |
|-------------|-------------------------|-------------------|---------------|
| <i>MKS1</i> | Arg166Trp               | Probably damaging | Tolerated     |
| <i>MKS3</i> | Tyr54Cys                | Probably damaging | Not tolerated |
| <i>MKS3</i> | Ser245Phe               | Possibly damaging | Not tolerated |
| <i>MKS3</i> | Trp296Cys               | Probably damaging | Tolerated     |
| <i>MKS3</i> | Cys615Arg               | Probably damaging | Tolerated     |
| <i>MKS6</i> | Thr1114Met              | Possibly damaging | Tolerated     |
